# Supplementary material
Source: MDPI journal article supplement (https://www.mdpi.com/1424-8247/14/5/391)
Supplement: s1 [file s1]

## Supplementary

Table S1: Significantly dysregulated mRNA at least 2-fold commonly in tpMDA and tsMDA as compared to their respective controls

| Refseq    | Symbol | tpMDA vs pMDA |          | tsMDA vs tsMDA |          |
|-----------|--------|---------------|----------|----------------|----------|
|           |        | Regulation    | p-value  | Regulation     | p-value  |
| Hs.591293 | ALCAM  | -10.3708      | 0.000241 | -9.48          | 0.003445 |
| Hs.590970 | AXL    | -3.6584       | 0.000284 | -5.7           | 0.011933 |
| Hs.712050 | CD24   | -9.2877       | 0.021891 | -10.31         | 0.030796 |
| Hs.502328 | CD44   | -3.366        | 0.007249 | -3.04          | 0.020179 |
| Hs.24529  | CHEK1  | -2.1762       | 0.004843 | -2.42          | 0.013949 |
| Hs.129452 | DACH1  | -17.2568      | 0.000305 | -6.98          | 0.031733 |
| Hs.631988 | DDR1   | -15.1365      | 0.000301 | -5.35          | 0.010887 |
| Hs.40499  | DKK1   | -12.8463      | 0.007066 | -2.6           | 0.005304 |
| Hs.511076 | DLL4   | 2.7376        | 0.009138 | 2.85           | 0.000614 |
| Hs.419815 | EGF    | -7.6401       | 0.001131 | -9.96          | 0.008957 |
| Hs.542050 | EPCAM  | -5.0391       | 0.003102 | -2.35          | 0.007788 |
| Hs.446352 | ERBB2  | -5.693        | 0.000615 | -4.8           | 0.003329 |
| Hs.514038 | FLOT2  | -4.6928       | 0.00094  | -5.73          | 0.00489  |
| Hs.155651 | FOXA2  | -4.2726       | 0.001713 | -7.46          | 0.011321 |
| Hs.59368  | FOXP1  | -34.7805      | 0.000262 | -19.01         | 0.012    |
| Hs.88556  | HDAC1  | -2.4179       | 0.011826 | -4.29          | 0.017716 |
| Hs.504609 | ID1    | -16.7571      | 0.000002 | -19.77         | 0.000305 |
| Hs.597664 | IKBKB  | -10.9453      | 0.000002 | -6.47          | 0.001509 |
| Hs.482077 | ITGA2  | -36.079       | 0.000417 | -30.6          | 0.006567 |
| Hs.133397 | ITGA6  | -36.6162      | 0.003259 | -21.37         | 0.006281 |
| Hs.224012 | JAG1   | -24.2317      | 0.014532 | -17.69         | 0.00359  |
| Hs.656213 | JAK2   | -12.7849      | 0.000032 | -6.87          | 0.001862 |
| Hs.631951 | MAML1  | -3.6431       | 0.001695 | -3.7           | 0.001578 |
| Hs.89603  | MUC1   | -30.6805      | 0.024952 | -13.34         | 0.006396 |
| Hs.202453 | MYC    | -6.0288       | 0.010922 | -2.57          | 0.029429 |
| Hs.618430 | NFKB1  | -5.8197       | 0.007383 | -7.83          | 0.01179  |
| Hs.495473 | NOTCH1 | -13.0746      | 0.041332 | -12.9          | 0.007066 |
| Hs.491582 | PLAT   | -91.2305      | 0.029918 | -29.21         | 0.010689 |
| Hs.463059 | STAT3  | -3.595        | 0.000945 | -4.17          | 0.003564 |
| Hs.409911 | TAZ    | -6.6513       | 0.000617 | -7.18          | 0.013042 |
| Hs.494622 | TGFBR1 | -5.3059       | 0.003772 | -5.22          | 0.005948 |
| Hs.503692 | YAP1   | -8.956        | 0.011124 | -6.04          | 0.020181 |
| Hs.124503 | ZEB1   | -8.2047       | 0.000168 | -6.07          | 0.017362 |

Table S2: Significantly dysregulated mRNA at least 2-fold exclusively in tpMDA and tsMDA as compared to their respective controls

| <b>tpMDA vs pMDA</b> |               |                   |                |
|----------------------|---------------|-------------------|----------------|
| <b>Refseq</b>        | <b>Symbol</b> | <b>Regulation</b> | <b>p-value</b> |
| Hs.374990            | CD38          | -4.7884           | 0.017924       |
| Hs.647667            | KLF17         | -13.3461          | 0.008453       |
| Hs.306178            | MERTK         | -28.6492          | 0.000011       |
| Hs.518438            | SOX2          | 4.3413            | 0.008621       |
| <b>tsMDA vs sMDA</b> |               |                   |                |
| Hs.404102            | ABCB5         | 2.85              | 0.000614       |
| Hs.76392             | ALDH1A1       | 2.85              | 0.000614       |
| Hs.367437            | ATM           | -4.69             | 0.000642       |
| Hs.434961            | ATXN1         | -68.11            | 0.001344       |
| Hs.473163            | BMP7          | 2.85              | 0.000614       |
| Hs.374990            | CD34          | 2.31              | 0.021205       |
| Hs.379912            | DLL1          | 2.85              | 0.000614       |
| Hs.202672            | DNMT1         | -4.72             | 0.042227       |
| Hs.76753             | ENG           | -2.83             | 0.043573       |
| Hs.39925             | ETFA          | -2.35             | 0.010367       |
| Hs.533683            | FGFR2         | 2.85              | 0.000614       |
| Hs.445733            | GSK3B         | -6.32             | 0.016282       |
| Hs.624               | CXCL8         | 2.39              | 0.014753       |
| Hs.440955            | ITGA4         | 2.85              | 0.000614       |
| Hs.643813            | ITGB1         | -6.59             | 0.003364       |
| Hs.479754            | KIT           | 2.85              | 0.000614       |
| Hs.549084            | LATS1         | -3.59             | 0.007695       |
| Hs.23616             | LIN28B        | 2.85              | 0.000614       |
| Hs.712553            | MS4A1         | 2.85              | 0.000614       |
| Hs.25960             | MYCN          | 2.85              | 0.000614       |
| Hs.635882            | NANOG         | -3.72             | 0.029433       |
| Hs.709191            | NOS2          | 2.33              | 0.005285       |
| Hs.487360            | NOTCH2        | -8.57             | 0.001533       |
| Hs.514412            | PECAM1        | -9.37             | 0.030896       |
| Hs.249184            | POU5F1        | -4.33             | 0.025781       |
| Hs.614734            | PROM1         | 2.85              | 0.000614       |
| Hs.654514            | PTPRC         | 2.85              | 0.000614       |
| Hs.642842            | SAV1          | -2.31             | 0.047465       |
| Hs.437846            | SMO           | 2.85              | 0.000614       |
| Hs.48029             | SNAI1         | 13.03             | 0.001386       |
| Hs.644697            | THY1          | 2.85              | 0.000614       |
| Hs.66744             | TWIST1        | 2.85              | 0.000614       |
| Hs.745035            | TWIST2        | 2.85              | 0.000614       |
| Hs.249441            | WEE1          | -2.94             | 0.033911       |
| Hs.248164            | WNT1          | 2.85              | 0.000614       |
| Hs.484047            | WWC1          | -9.73             | 0.006622       |
| Hs.34871             | ZEB2          | -3.24             | 0.029514       |
